# Supplementary material for: Thermosensitive in situ hydrogel of paclitaxel conjugated poly(ε-caprolactone)-poly(ethylene glycol)-poly(ε-caprolactone)
Source: Royal Society of Chemistry journal article supplement (doi:10.1039/c2sm07172j), 2012-01-01
Supplement: c2sm07172j.pdf [file c2sm07172j.pdf]

# Supporting information for “Thermosensitive In-situ Hydrogel of Paclitaxel Conjugated Poly( $\epsilon$ -caprolactone)-Poly(ethylene glycol)-Poly( $\epsilon$ -caprolactone)”

Xiaona Lin, Liandong Deng, Yongshen Xu, Anjie Dong

School of Chemical Engineering and Technology, Tianjin University, Tianjin, 300072, China

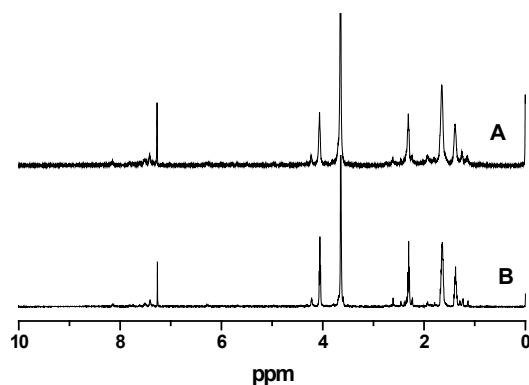

**Figure S1**  $^1\text{H}$  NMR spectra of PCEC/PTX (A) and NPs released from PCEC/PTX hydrogel (B).  $\text{CDCl}_3$  as solvent.

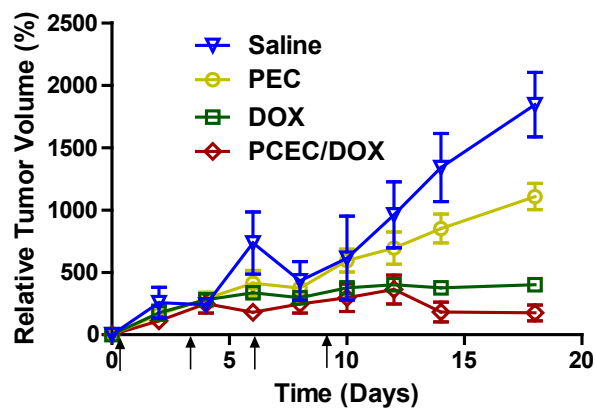

**Figure S2** *In vivo* antitumor activity of PCEC/DOX hydrogel against H460 human lung cancer cell-induced Balb/c nude mice. DOX formulations were given by intravenous injection for four doses (days 0, 3, 6, and 9, equivalent to 15 mg/kg of DOX); 100  $\mu\text{L}$  of the 25 wt% aqueous solution of PCEC/DOX (equivalent to 15 mg/kg of DOX) was given by a single intratumoral injection. The relative tumor volume changes as tumor inhibition effect. (n=5)

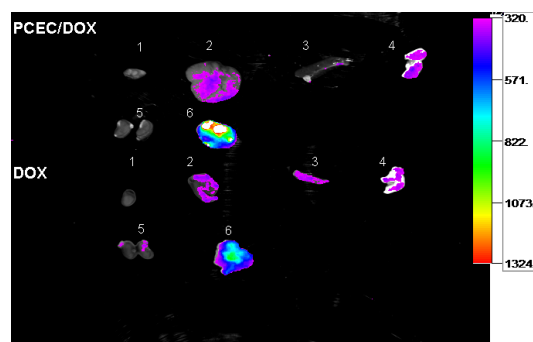

1 Heart 2 Liver 3 Spleen 4 Lung 5 Kidney 6 Tumor

**Figure S3** Systemic distribution of DOX after a single injection of PCEC/DOX (3.75 mg/Kg) hydrogel and a single injection of free DOX (3.75 mg/kg) in xenograft-bearing mice at the 4th day. Drug levels in each tissue (heart, liver, spleen, lung, kidney, tumor) were measured by *in vivo* spectral fluorescence imaging.
